# Supplementary material
Source: Springer Nature journal article supplement (https://www.springermedizin.de/resource/supplementary/12885_2013_3968_MOESM2_ESM.pdf/9464860)

**A****pTa Low-grade**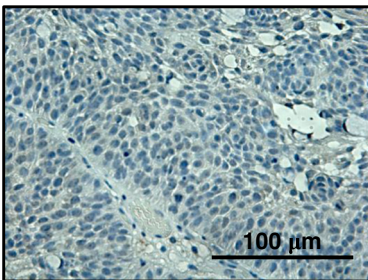400  $\times$ **pTa High-grade**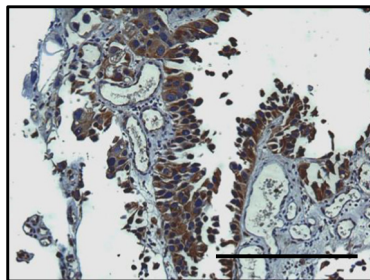400  $\times$ 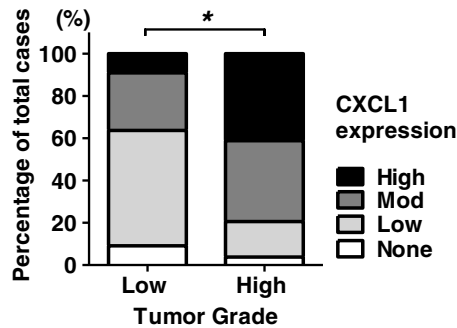**B****pT1 High-grade**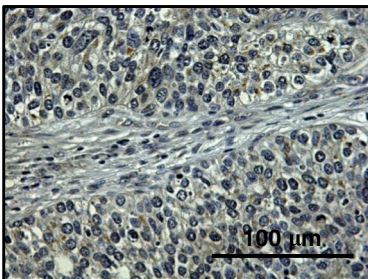400  $\times$ **pT3 High-grade**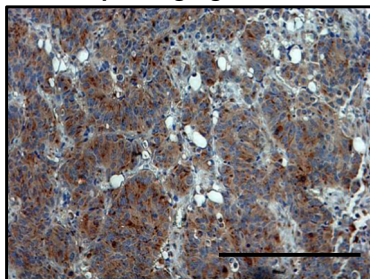400  $\times$ 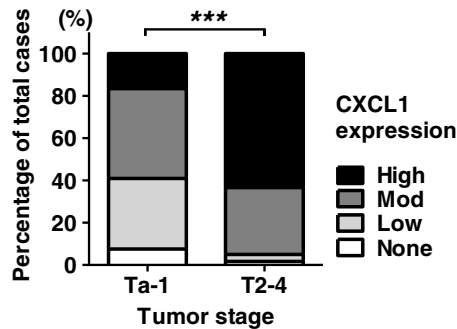

Supplement: MOESM2 [file 9464860]
